# Supplementary material for: N,N-Bis-(dimethylfluorosilylmethyl)amides of N-organosulfonylproline and sarcosine: synthesis, structure, stereodynamic behaviour and in silico studies
Source: Royal Society of Chemistry journal article supplement (doi:10.1039/c6ra14450k), 2016-01-01
Supplement: c6ra14450k1.pdf [file c6ra14450k1.pdf]

***N, N*-bis-(dimethylfluorosilylmethyl)amides of *N*-  
organosulfonylproline  
and sarcosine: synthesis, structure, stereodynamic behaviour  
and *in silico* studies**

**Supporting materials**

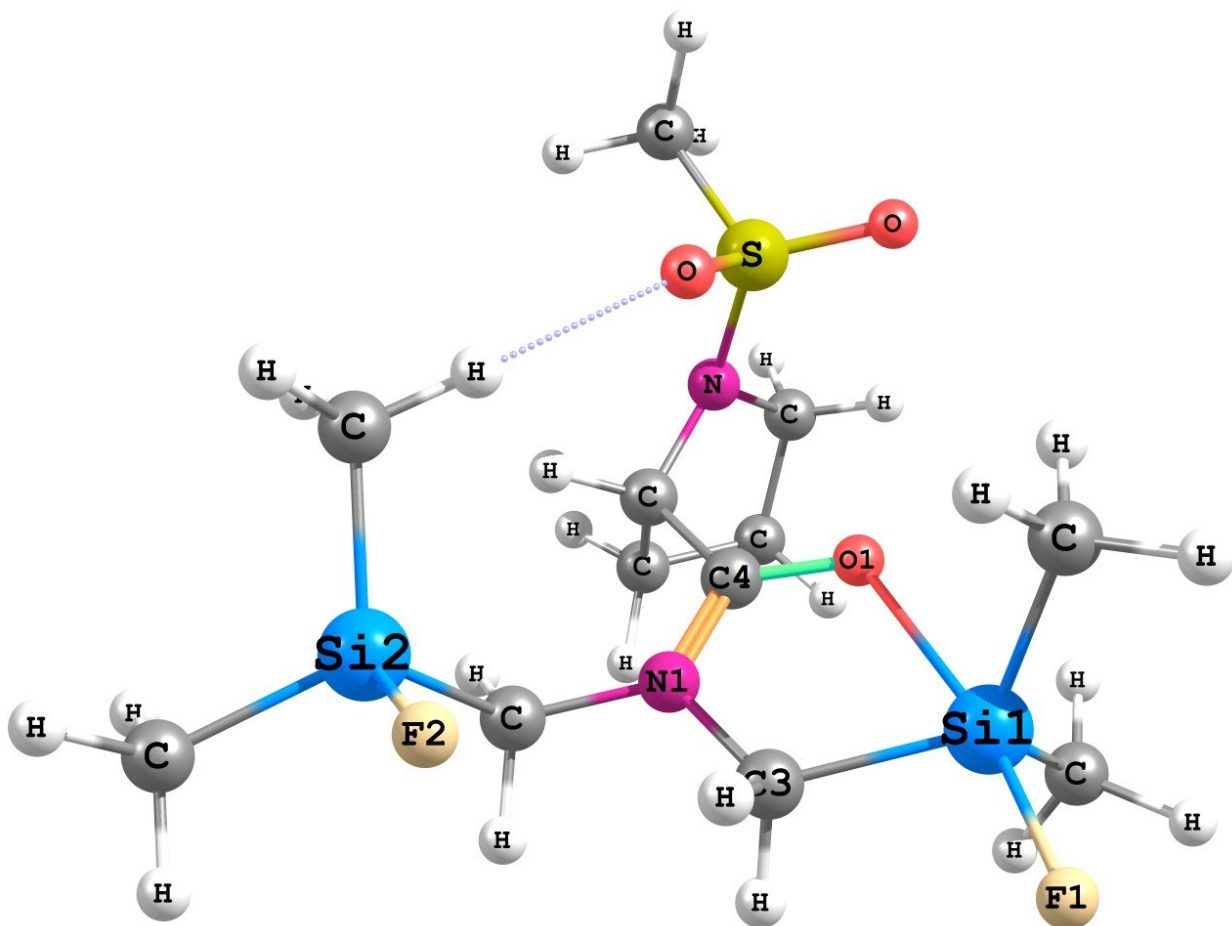

Figure 1s. General view of conformer **9a-cyclic**

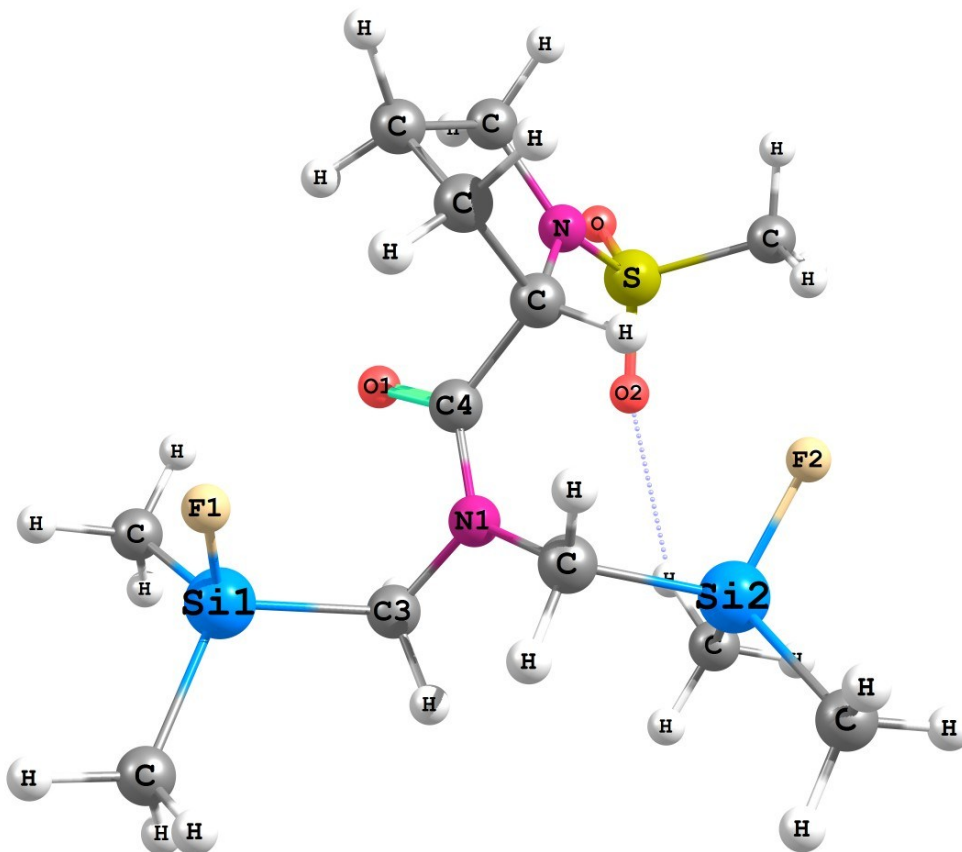

Figure 2s. General view of conformer **9a-acyclic**

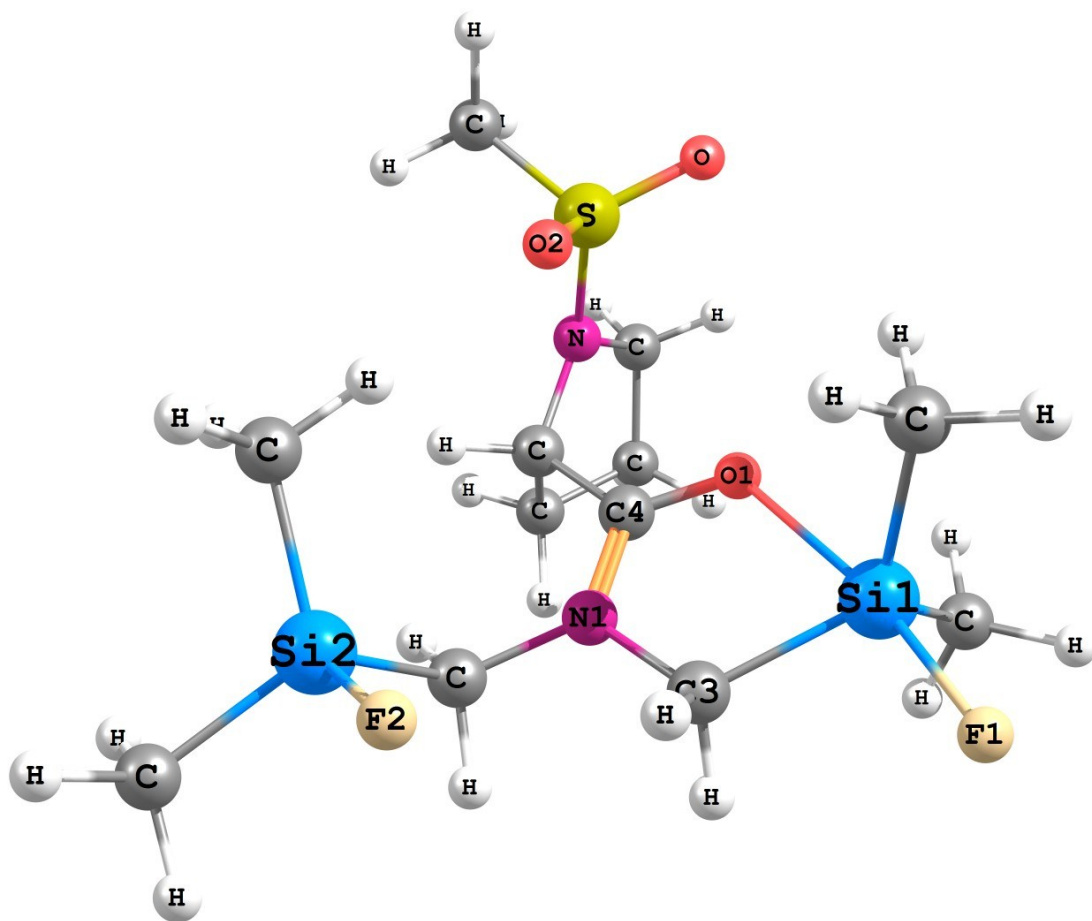

Figure 3s. General view of conformer 9a-cyclic-CDCl<sub>3</sub>

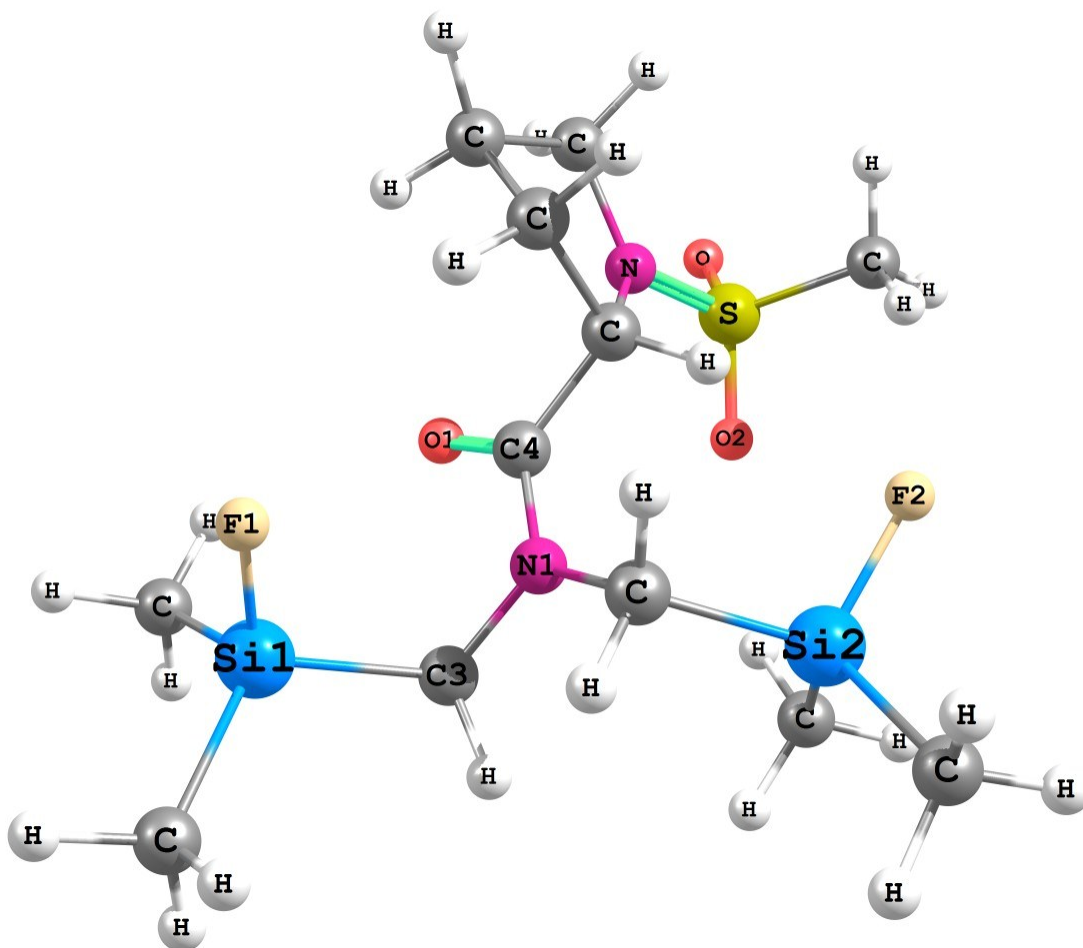

Figure 4s. General view of conformer **9a-cyclic-CDCl<sub>3</sub>**

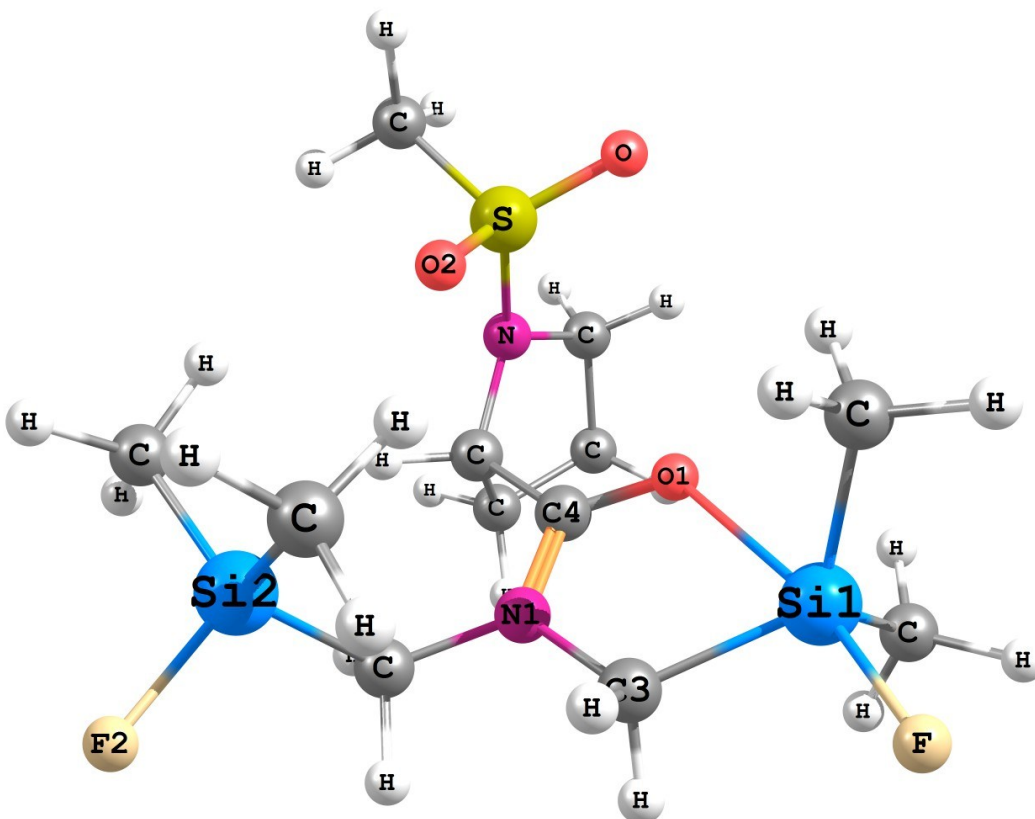

Figure 5s. General view of conformer **9a-cyclic2**

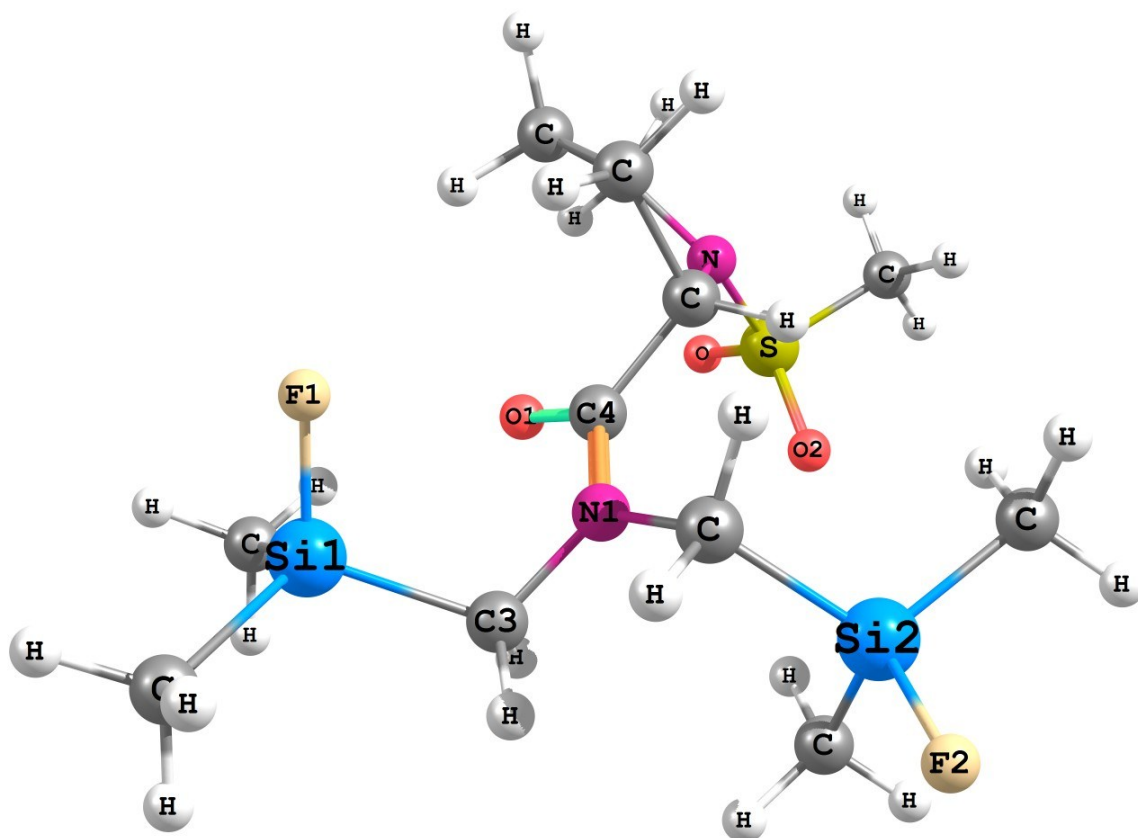

Figure 6s. General view of conformer **9a-acyclic2**

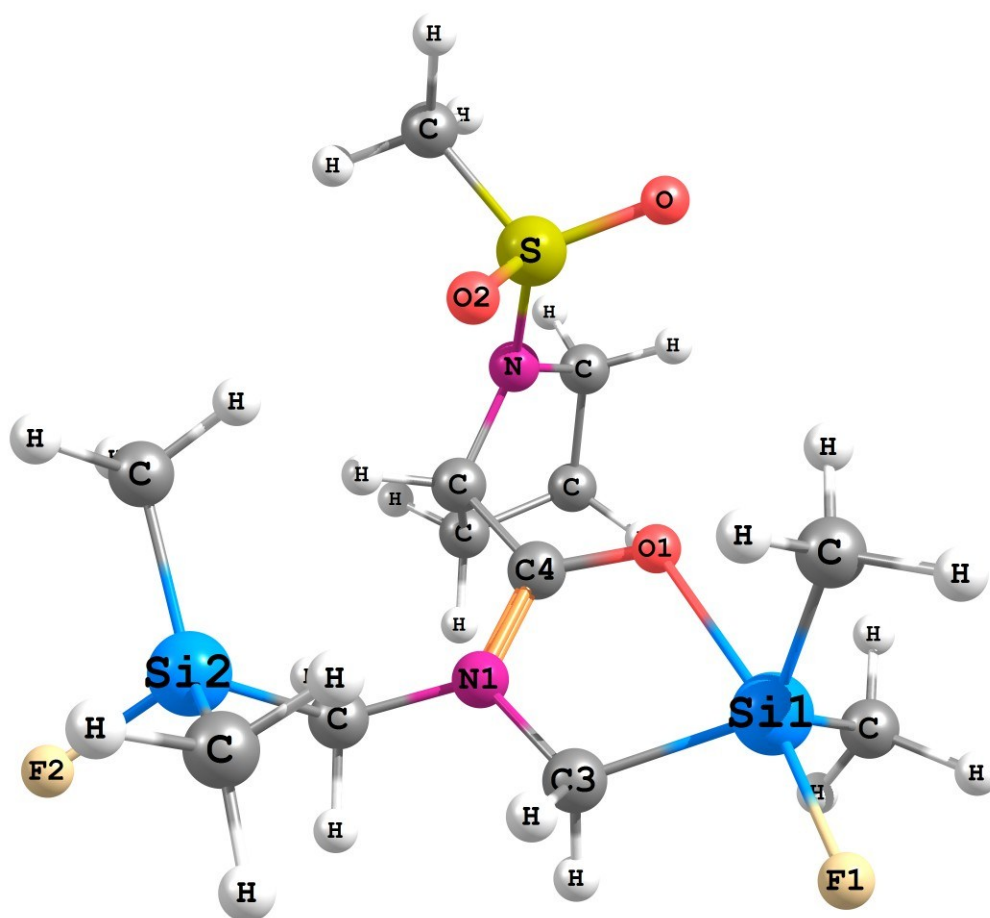

Figure 7s. General view of conformer **9a-cyclic2-CDCl<sub>3</sub>**

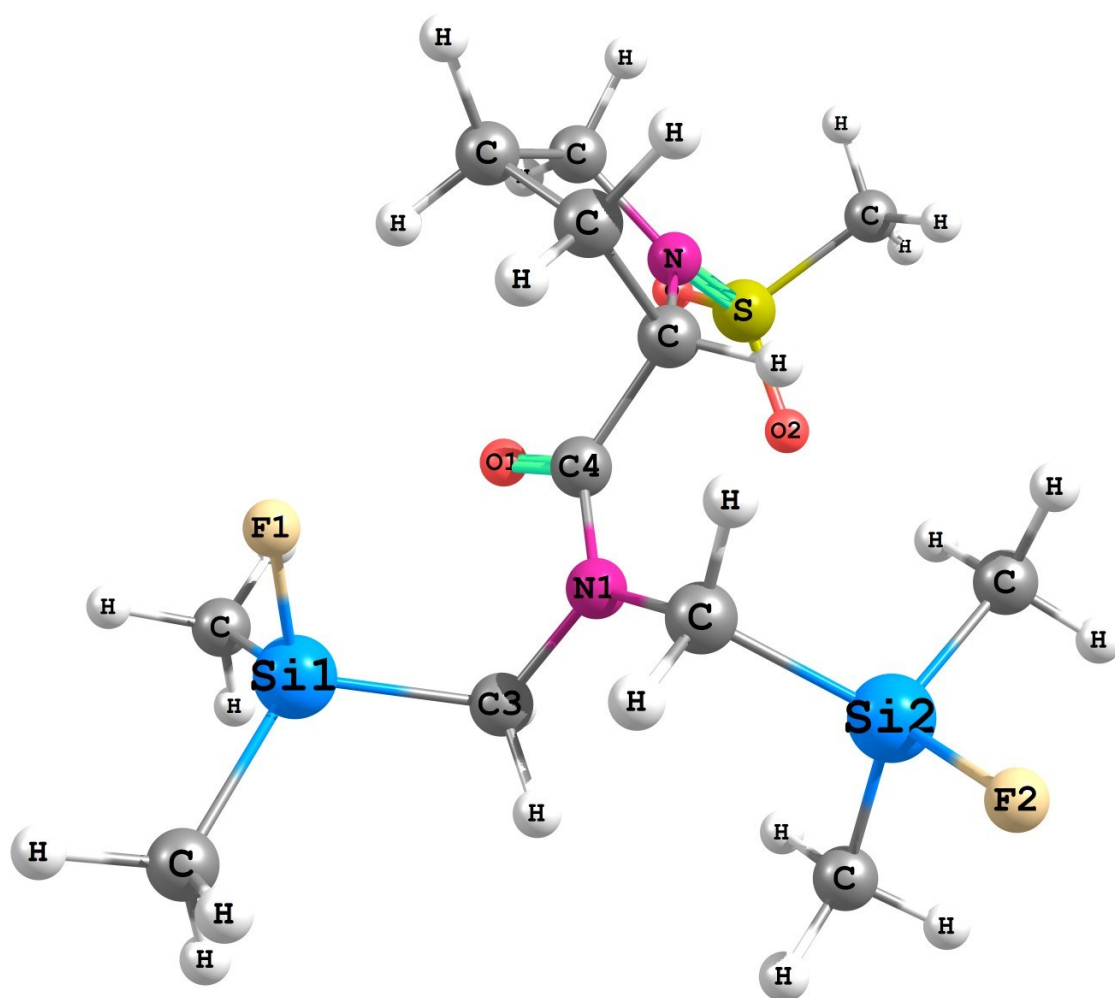

Figure 8s. General view of conformer 9a-cyclic2-CDCl<sub>3</sub>

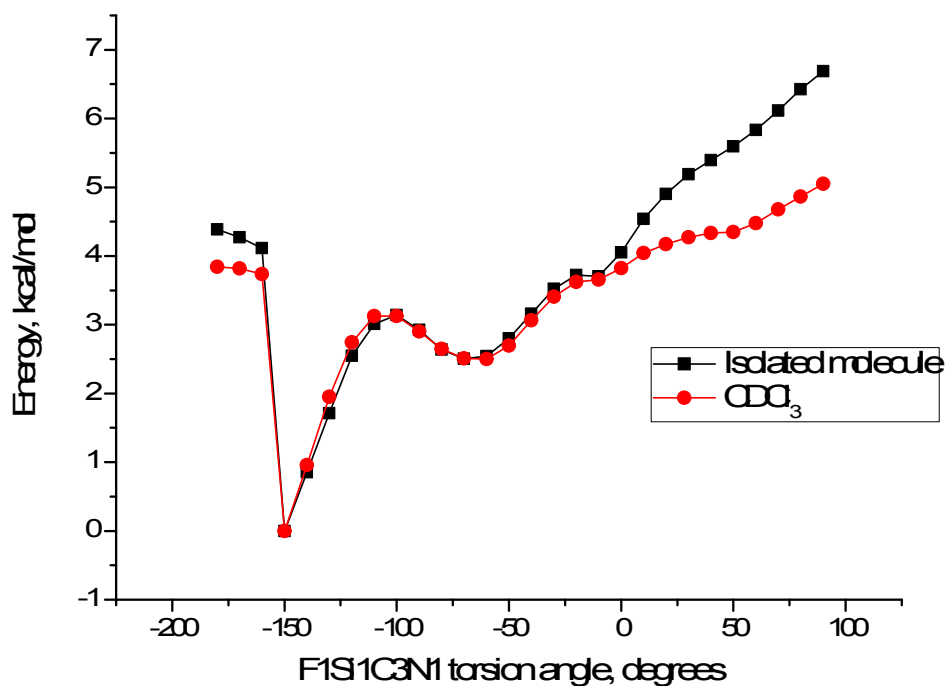

Figure 9s. The plot of total energy vs value of F1Si1C3N1 torsion angle. The values of total energy were calculated by relaxed potential energy scan at 10° scanstep and the lowest value taken as reference.

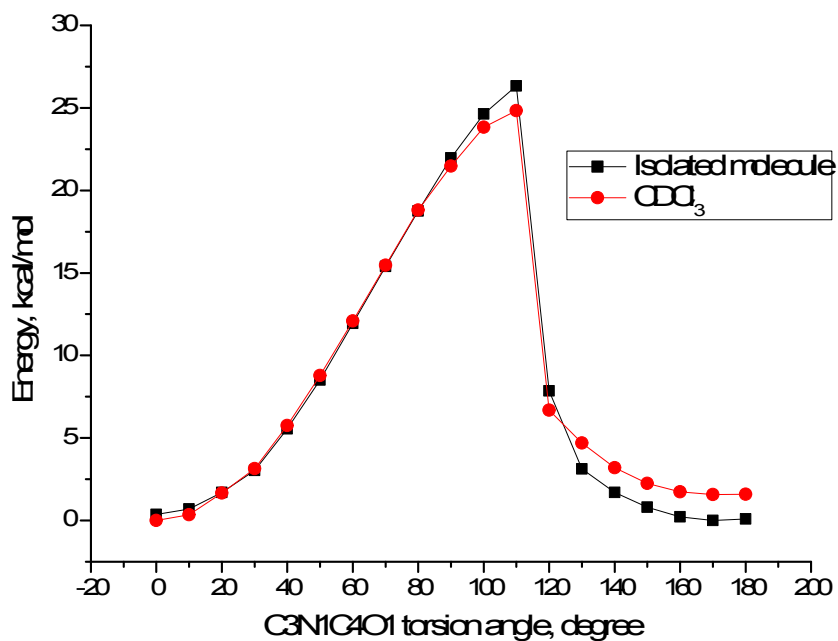

Figure 10s. The plot of total energy vs value of C3N1C4O1 torsion angle. The values of total energy were calculated by relaxed potential energy scan at 10° scanstep and the lowest value taken as reference.

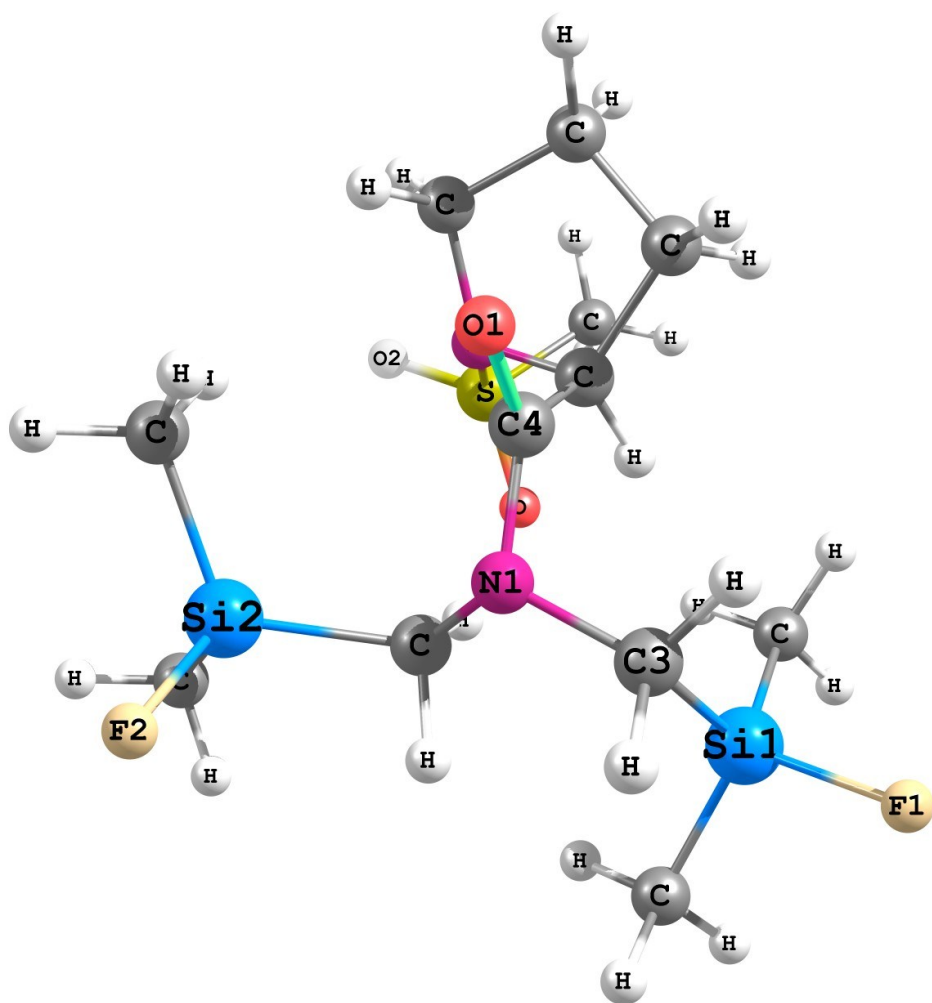

Figure 9s. General view of transition state **9a-ts**

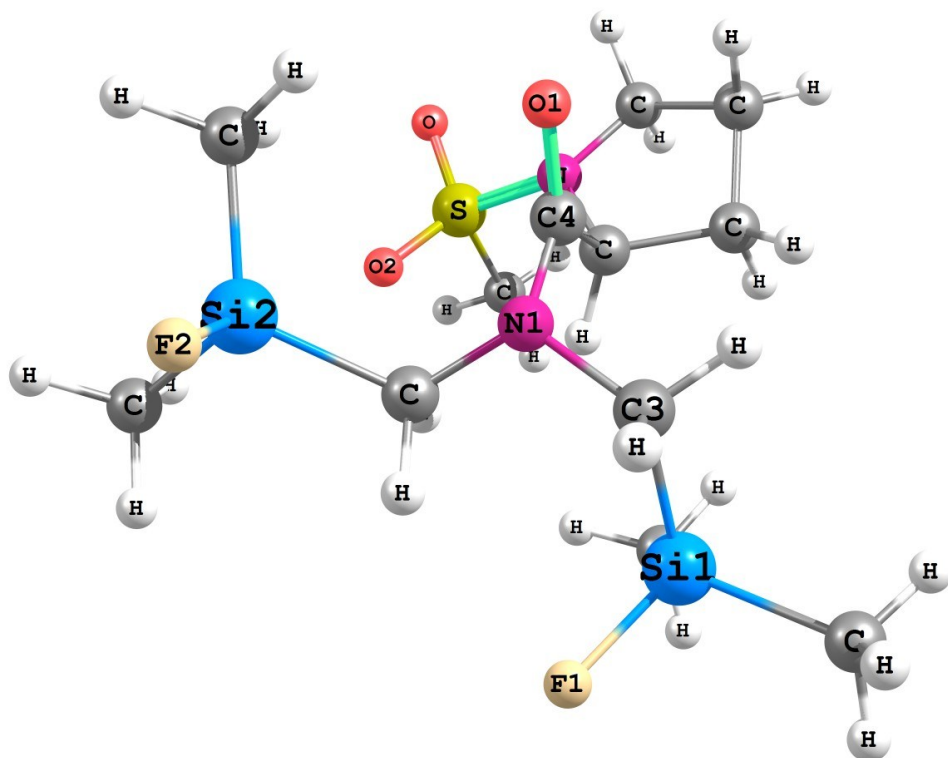

Figure 10s. General view of transition state **9a-ts-CDCl<sub>3</sub>**



**Coordinates and energies (a.u.) of the calculated structure (Table 2)****9a-cyclic**

symmetry c1

|    |              |              |              |
|----|--------------|--------------|--------------|
| Si | 0.989330000  | -2.880851000 | -0.341339000 |
| Si | 2.762061000  | 2.030228000  | -0.087038000 |
| F  | 2.368514000  | -3.765250000 | -0.637874000 |
| F  | 3.666919000  | 1.032815000  | -1.008515000 |
| O  | -0.694672000 | -1.335977000 | 0.278447000  |
| O  | -1.293564000 | 1.151638000  | -1.693488000 |
| O  | -3.374221000 | -0.289919000 | -1.540480000 |
| S  | -2.590356000 | 0.849447000  | -1.108016000 |
| N  | 1.184384000  | -0.210820000 | 0.743910000  |
| N  | -2.364435000 | 0.803754000  | 0.536729000  |
| C  | 0.097147000  | -3.994325000 | 0.868467000  |
| C  | 0.247944000  | -2.706720000 | -2.042986000 |
| C  | 1.951903000  | -1.390240000 | 0.364554000  |
| C  | -0.149125000 | -0.296898000 | 0.658858000  |
| C  | 1.931263000  | 0.941896000  | 1.234095000  |
| C  | 3.923431000  | 3.209782000  | 0.769221000  |
| C  | 1.539251000  | 2.884008000  | -1.189991000 |
| C  | -1.020851000 | 0.881364000  | 1.093438000  |
| C  | -1.327223000 | 0.791933000  | 2.595022000  |
| C  | -2.457576000 | -0.238245000 | 2.653820000  |
| C  | -3.273872000 | 0.010461000  | 1.381093000  |
| C  | -3.619281000 | 2.290460000  | -1.320335000 |
| H  | 0.259997000  | -5.039923000 | 0.591477000  |
| H  | -0.974728000 | -3.792771000 | 0.885750000  |
| H  | 0.488200000  | -3.860828000 | 1.882485000  |
| H  | 0.384534000  | -3.639552000 | -2.598243000 |
| H  | 0.752513000  | -1.913382000 | -2.603178000 |
| H  | -0.814418000 | -2.462795000 | -2.001501000 |
| H  | 2.511643000  | -1.747512000 | 1.240075000  |
| H  | 2.700164000  | -1.106540000 | -0.382663000 |
| H  | 2.711091000  | 0.564824000  | 1.908337000  |
| H  | 1.294257000  | 1.575427000  | 1.858838000  |

|                                            |              |                             |              |
|--------------------------------------------|--------------|-----------------------------|--------------|
| H                                          | 4.455539000  | 3.824275000                 | 0.037193000  |
| H                                          | 4.670428000  | 2.673394000                 | 1.361261000  |
| H                                          | 3.382437000  | 3.886588000                 | 1.438459000  |
| H                                          | 2.057717000  | 3.347683000                 | -2.034766000 |
| H                                          | 1.020950000  | 3.681255000                 | -0.645850000 |
| H                                          | 0.784708000  | 2.197069000                 | -1.583242000 |
| H                                          | -0.559845000 | 1.828621000                 | 0.811600000  |
| H                                          | -0.455540000 | 0.501124000                 | 3.185712000  |
| H                                          | -1.670341000 | 1.770117000                 | 2.944471000  |
| H                                          | -2.042300000 | -1.247248000                | 2.628468000  |
| H                                          | -3.061616000 | -0.140519000                | 3.557642000  |
| H                                          | -3.550762000 | -0.919792000                | 0.882719000  |
| H                                          | -4.182268000 | 0.588782000                 | 1.583154000  |
| H                                          | -3.828648000 | 2.374118000                 | -2.387307000 |
| H                                          | -3.077609000 | 3.164803000                 | -0.962828000 |
| H                                          | -4.546842000 | 2.144929000                 | -0.766862000 |
| Zero-point correction=                     |              | 0.387268 (Hartree/Particle) |              |
| Sum of electronic and zero-point Energies= |              | -1983.520420                |              |

### 9a-acyclic

symmetry c1

|    |              |              |              |
|----|--------------|--------------|--------------|
| Si | -0.342302000 | 2.969227000  | 0.245321000  |
| Si | 3.583671000  | -0.714940000 | -0.337303000 |
| F  | -1.823256000 | 2.515455000  | 0.800915000  |
| F  | 3.231200000  | -1.051929000 | 1.226165000  |
| O  | 0.607771000  | -1.643575000 | -0.621419000 |
| O  | -1.953656000 | 0.139889000  | -1.562221000 |
| O  | -3.420183000 | -1.927250000 | -1.591509000 |
| S  | -2.825949000 | -0.808538000 | -0.885450000 |
| N  | 1.048678000  | 0.473367000  | -0.022274000 |
| N  | -2.012471000 | -1.407187000 | 0.408086000  |
| C  | 0.049487000  | 4.578004000  | 1.104015000  |
| C  | -0.424946000 | 3.090936000  | -1.600944000 |
| C  | 0.883007000  | 1.640866000  | 0.837474000  |
| C  | 0.308333000  | -0.657100000 | 0.037509000  |

|                        |              |              |                             |
|------------------------|--------------|--------------|-----------------------------|
| C                      | 2.186750000  | 0.439299000  | -0.935469000                |
| C                      | 5.208422000  | 0.208980000  | -0.321390000                |
| C                      | 3.709203000  | -2.299635000 | -1.294663000                |
| C                      | -0.885657000 | -0.693828000 | 0.993299000                 |
| C                      | -0.558114000 | -1.574486000 | 2.209649000                 |
| C                      | -0.893596000 | -2.985207000 | 1.723179000                 |
| C                      | -2.140916000 | -2.796738000 | 0.862198000                 |
| C                      | -4.150674000 | 0.150753000  | -0.174218000                |
| H                      | -0.717509000 | 5.327911000  | 0.889978000                 |
| H                      | 1.010389000  | 4.979445000  | 0.766623000                 |
| H                      | 0.099313000  | 4.451514000  | 2.189582000                 |
| H                      | -1.137999000 | 3.861378000  | -1.908260000                |
| H                      | -0.750560000 | 2.133535000  | -2.016437000                |
| H                      | 0.551721000  | 3.347856000  | -2.023175000                |
| H                      | 1.866297000  | 2.113670000  | 0.939168000                 |
| H                      | 0.630264000  | 1.336208000  | 1.859044000                 |
| H                      | 2.555015000  | 1.461472000  | -1.056426000                |
| H                      | 1.840698000  | 0.096457000  | -1.916434000                |
| H                      | 6.022429000  | -0.425537000 | 0.041241000                 |
| H                      | 5.160166000  | 1.093787000  | 0.320426000                 |
| H                      | 5.474256000  | 0.541833000  | -1.330666000                |
| H                      | 4.476798000  | -2.956605000 | -0.875335000                |
| H                      | 3.977287000  | -2.093913000 | -2.336535000                |
| H                      | 2.745139000  | -2.811200000 | -1.285957000                |
| H                      | -1.196938000 | 0.307541000  | 1.290557000                 |
| H                      | 0.482667000  | -1.469176000 | 2.524566000                 |
| H                      | -1.205696000 | -1.285713000 | 3.043597000                 |
| H                      | -0.078397000 | -3.358235000 | 1.101898000                 |
| H                      | -1.062494000 | -3.683875000 | 2.545356000                 |
| H                      | -2.175842000 | -3.478277000 | 0.012017000                 |
| H                      | -3.060811000 | -2.920904000 | 1.447543000                 |
| H                      | -4.733189000 | 0.554252000  | -1.003360000                |
| H                      | -3.713137000 | 0.960272000  | 0.410395000                 |
| H                      | -4.768054000 | -0.505670000 | 0.438494000                 |
| Zero-point correction= |              |              | 0.387092 (Hartree/Particle) |

Sum of electronic and zero-point Energies= -1983.516415

**9a-cyclic-CDCl<sub>3</sub>**

symmetry c1

|    |              |              |              |
|----|--------------|--------------|--------------|
| Si | 0.919167000  | -2.865124000 | -0.316333000 |
| Si | 2.794508000  | 2.005700000  | -0.092339000 |
| F  | 2.281831000  | -3.799655000 | -0.651145000 |
| F  | 3.703757000  | 0.994487000  | -1.009652000 |
| O  | -0.649813000 | -1.369147000 | 0.278396000  |
| O  | -1.306221000 | 1.010470000  | -1.748266000 |
| O  | -3.505057000 | -0.211917000 | -1.508373000 |
| S  | -2.605698000 | 0.858627000  | -1.106637000 |
| N  | 1.213444000  | -0.229421000 | 0.742655000  |
| N  | -2.329798000 | 0.768994000  | 0.512465000  |
| C  | 0.051129000  | -3.999762000 | 0.894287000  |
| C  | 0.186956000  | -2.708242000 | -2.029228000 |
| C  | 1.962532000  | -1.420006000 | 0.365055000  |
| C  | -0.114878000 | -0.315165000 | 0.656615000  |
| C  | 1.966628000  | 0.921038000  | 1.231322000  |
| C  | 3.950191000  | 3.197740000  | 0.744742000  |
| C  | 1.564708000  | 2.826870000  | -1.212200000 |
| C  | -0.989263000 | 0.865000000  | 1.068125000  |
| C  | -1.288042000 | 0.822804000  | 2.575463000  |
| C  | -2.461638000 | -0.152085000 | 2.669427000  |
| C  | -3.300196000 | 0.147296000  | 1.427070000  |
| C  | -3.491023000 | 2.388642000  | -1.309053000 |
| H  | 0.221981000  | -5.044473000 | 0.618941000  |
| H  | -1.023165000 | -3.810743000 | 0.921228000  |
| H  | 0.446227000  | -3.856470000 | 1.905622000  |
| H  | 0.348019000  | -3.632464000 | -2.592065000 |
| H  | 0.673933000  | -1.896047000 | -2.578690000 |
| H  | -0.881909000 | -2.490813000 | -1.992719000 |
| H  | 2.521406000  | -1.782201000 | 1.238078000  |
| H  | 2.706538000  | -1.150911000 | -0.391227000 |
| H  | 2.743740000  | 0.541179000  | 1.905443000  |

|                                            |              |              |                             |
|--------------------------------------------|--------------|--------------|-----------------------------|
| H                                          | 1.332724000  | 1.558207000  | 1.854074000                 |
| H                                          | 4.478337000  | 3.805843000  | 0.004635000                 |
| H                                          | 4.695273000  | 2.671017000  | 1.347511000                 |
| H                                          | 3.398512000  | 3.876900000  | 1.402502000                 |
| H                                          | 2.078720000  | 3.297115000  | -2.055863000                |
| H                                          | 1.029105000  | 3.614353000  | -0.671096000                |
| H                                          | 0.827127000  | 2.120568000  | -1.603137000                |
| H                                          | -0.523198000 | 1.803669000  | 0.765701000                 |
| H                                          | -0.424916000 | 0.510291000  | 3.166493000                 |
| H                                          | -1.584937000 | 1.823316000  | 2.901964000                 |
| H                                          | -2.097108000 | -1.180427000 | 2.627346000                 |
| H                                          | -3.033703000 | -0.028984000 | 3.590191000                 |
| H                                          | -3.726366000 | -0.754572000 | 0.985597000                 |
| H                                          | -4.110841000 | 0.851822000  | 1.643213000                 |
| H                                          | -3.724814000 | 2.488847000  | -2.369335000                |
| H                                          | -2.851869000 | 3.205327000  | -0.976215000                |
| H                                          | -4.408808000 | 2.343033000  | -0.723040000                |
| Zero-point correction=                     |              |              | 0.387151 (Hartree/Particle) |
| Sum of electronic and zero-point Energies= |              |              | -1983.537649                |

### 9a-acyclic-CDCl<sub>3</sub>

symmetry c1

|    |              |              |              |
|----|--------------|--------------|--------------|
| Si | -0.097906000 | 2.961269000  | 0.234408000  |
| Si | 3.636395000  | -0.868682000 | -0.305370000 |
| F  | -1.618705000 | 2.631315000  | 0.788661000  |
| F  | 3.173392000  | -1.276252000 | 1.218800000  |
| O  | 0.553695000  | -1.674604000 | -0.783499000 |
| O  | -2.226378000 | 0.214578000  | -1.669500000 |
| O  | -3.838009000 | -1.719669000 | -1.461724000 |
| S  | -3.036264000 | -0.673161000 | -0.846489000 |
| N  | 1.115890000  | 0.384667000  | -0.078932000 |
| N  | -2.029976000 | -1.400626000 | 0.214125000  |
| C  | 0.424425000  | 4.539425000  | 1.069153000  |
| C  | -0.188497000 | 3.048412000  | -1.614257000 |
| C  | 0.994090000  | 1.522827000  | 0.830704000  |

|   |              |              |              |
|---|--------------|--------------|--------------|
| C | 0.302273000  | -0.693406000 | -0.093936000 |
| C | 2.291755000  | 0.324594000  | -0.941770000 |
| C | 5.271372000  | 0.012891000  | -0.143059000 |
| C | 3.774560000  | -2.422772000 | -1.310756000 |
| C | -0.921602000 | -0.667863000 | 0.822652000  |
| C | -0.651740000 | -1.471196000 | 2.109933000  |
| C | -1.143971000 | -2.875596000 | 1.764940000  |
| C | -2.401707000 | -2.613318000 | 0.949417000  |
| C | -4.131168000 | 0.357522000  | 0.109850000  |
| H | -0.271691000 | 5.350389000  | 0.836772000  |
| H | 1.419543000  | 4.842548000  | 0.728771000  |
| H | 0.459448000  | 4.421684000  | 2.156078000  |
| H | -0.835460000 | 3.870980000  | -1.932072000 |
| H | -0.595797000 | 2.113982000  | -2.009983000 |
| H | 0.803677000  | 3.210409000  | -2.046689000 |
| H | 2.002602000  | 1.914699000  | 0.999328000  |
| H | 0.665570000  | 1.194697000  | 1.822301000  |
| H | 2.693314000  | 1.336423000  | -1.037507000 |
| H | 1.981556000  | 0.001243000  | -1.940337000 |
| H | 6.045260000  | -0.654049000 | 0.247969000  |
| H | 5.193603000  | 0.876207000  | 0.524530000  |
| H | 5.606188000  | 0.374336000  | -1.121284000 |
| H | 4.512659000  | -3.107608000 | -0.883334000 |
| H | 4.089145000  | -2.183547000 | -2.332055000 |
| H | 2.803581000  | -2.919582000 | -1.360679000 |
| H | -1.218367000 | 0.355858000  | 1.054161000  |
| H | 0.401494000  | -1.444862000 | 2.396690000  |
| H | -1.242081000 | -1.049178000 | 2.928804000  |
| H | -0.406386000 | -3.384765000 | 1.141386000  |
| H | -1.343283000 | -3.484896000 | 2.648234000  |
| H | -2.644486000 | -3.417162000 | 0.254824000  |
| H | -3.267265000 | -2.436553000 | 1.602993000  |
| H | -4.830664000 | 0.818395000  | -0.588147000 |
| H | -3.538931000 | 1.124897000  | 0.608896000  |
| H | -4.668638000 | -0.265589000 | 0.824687000  |

Zero-point correction= 0.386543 (Hartree/Particle)

Sum of electronic and zero-point Energies= -1983.531985

### 9a-cyclic2

symmetry c1

|    |              |              |              |
|----|--------------|--------------|--------------|
| Si | 2.555795000  | -1.783677000 | -0.394770000 |
| Si | 0.743110000  | 3.147311000  | 0.100946000  |
| F  | 4.185714000  | -1.656745000 | -0.718109000 |
| F  | 1.582002000  | 4.415408000  | 0.706361000  |
| O  | 0.311435000  | -1.575738000 | 0.289564000  |
| O  | -1.461752000 | 0.630106000  | -1.473029000 |
| O  | -2.370467000 | -1.698240000 | -1.890983000 |
| S  | -2.404432000 | -0.440721000 | -1.171830000 |
| N  | 1.169569000  | 0.408728000  | 0.873291000  |
| N  | -2.298832000 | -0.696144000 | 0.463145000  |
| C  | 2.517430000  | -3.297259000 | 0.702217000  |
| C  | 1.835749000  | -1.947810000 | -2.107128000 |
| C  | 2.475057000  | -0.067681000 | 0.442250000  |
| C  | 0.144737000  | -0.439510000 | 0.747321000  |
| C  | 1.081404000  | 1.773139000  | 1.386760000  |
| C  | -1.044288000 | 3.665726000  | 0.054973000  |
| C  | 1.393279000  | 2.731685000  | -1.585633000 |
| C  | -1.246115000 | -0.034428000 | 1.226359000  |
| C  | -1.510650000 | -0.591781000 | 2.631013000  |
| C  | -1.910020000 | -2.045292000 | 2.365097000  |
| C  | -2.671223000 | -2.001910000 | 1.035554000  |
| C  | -4.047716000 | 0.221776000  | -1.365566000 |
| H  | 3.279652000  | -4.008484000 | 0.371410000  |
| H  | 1.541386000  | -3.783899000 | 0.680665000  |
| H  | 2.744547000  | -3.032846000 | 1.740064000  |
| H  | 2.431715000  | -2.662397000 | -2.683240000 |
| H  | 1.880923000  | -0.989831000 | -2.634997000 |
| H  | 0.795950000  | -2.276251000 | -2.091295000 |
| H  | 3.154704000  | -0.085806000 | 1.304837000  |
| H  | 2.903919000  | 0.647396000  | -0.268180000 |

|                                            |              |              |                             |
|--------------------------------------------|--------------|--------------|-----------------------------|
| H                                          | 2.049153000  | 2.003153000  | 1.844741000                 |
| H                                          | 0.358067000  | 1.831682000  | 2.206086000                 |
| H                                          | -1.146950000 | 4.592098000  | -0.518465000                |
| H                                          | -1.447784000 | 3.846777000  | 1.055632000                 |
| H                                          | -1.638939000 | 2.895430000  | -0.444382000                |
| H                                          | 1.171154000  | 3.545935000  | -2.281939000                |
| H                                          | 0.896336000  | 1.829631000  | -1.956558000                |
| H                                          | 2.474051000  | 2.570643000  | -1.590935000                |
| H                                          | -1.380880000 | 1.045324000  | 1.178356000                 |
| H                                          | -0.641029000 | -0.499612000 | 3.285810000                 |
| H                                          | -2.338016000 | -0.033822000 | 3.078827000                 |
| H                                          | -1.016841000 | -2.660807000 | 2.251360000                 |
| H                                          | -2.515335000 | -2.461540000 | 3.172463000                 |
| H                                          | -2.375925000 | -2.813692000 | 0.368939000                 |
| H                                          | -3.756274000 | -2.038706000 | 1.182482000                 |
| H                                          | -4.191172000 | 0.405404000  | -2.430911000                |
| H                                          | -4.124115000 | 1.147972000  | -0.797883000                |
| H                                          | -4.766257000 | -0.518089000 | -1.013109000                |
| Zero-point correction=                     |              |              | 0.387603 (Hartree/Particle) |
| Sum of electronic and zero-point Energies= |              |              | -1983.521917                |

### 9a-acyclic2

symmetry c1

|    |              |              |              |
|----|--------------|--------------|--------------|
| Si | -0.013601000 | 3.177921000  | 0.199499000  |
| Si | 3.353550000  | -1.030181000 | -0.363123000 |
| F  | 0.796191000  | 4.491015000  | 0.752105000  |
| F  | 2.902746000  | -1.619526000 | 1.096538000  |
| O  | 0.412857000  | -1.455692000 | -0.638217000 |
| O  | -2.265583000 | 0.542565000  | -1.149603000 |
| O  | -2.911182000 | -1.806331000 | -1.851413000 |
| S  | -2.849215000 | -0.760332000 | -0.850349000 |
| N  | 1.059929000  | 0.529169000  | 0.175726000  |
| N  | -2.100898000 | -1.303607000 | 0.519943000  |
| C  | 0.103851000  | 3.128971000  | -1.651653000 |
| C  | -1.771212000 | 3.340474000  | 0.789115000  |



|   |              |              |              |
|---|--------------|--------------|--------------|
| C | 0.905393000  | 1.714134000  | 1.013988000  |
| C | 0.208660000  | -0.514671000 | 0.120154000  |
| C | 2.209437000  | 0.455554000  | -0.721902000 |
| C | 5.102453000  | -0.407166000 | -0.143899000 |
| C | 3.281964000  | -2.377496000 | -1.638199000 |
| C | -0.980944000 | -0.554856000 | 1.080298000  |
| C | -0.632020000 | -1.418857000 | 2.299374000  |
| C | -0.839607000 | -2.846903000 | 1.788043000  |
| C | -2.007989000 | -2.746660000 | 0.800509000  |
| C | -4.522532000 | -0.472719000 | -0.303427000 |
| H | -0.383044000 | 4.008009000  | -2.084288000 |
| H | -0.415507000 | 2.239145000  | -2.021711000 |
| H | 1.138080000  | 3.106400000  | -2.003783000 |
| H | -2.195945000 | 4.290567000  | 0.451161000  |
| H | -1.842658000 | 3.310169000  | 1.880323000  |
| H | -2.373816000 | 2.532778000  | 0.363117000  |
| H | 1.907308000  | 2.063452000  | 1.286014000  |
| H | 0.440579000  | 1.445318000  | 1.966476000  |
| H | 2.771765000  | 1.386759000  | -0.620308000 |
| H | 1.864100000  | 0.391245000  | -1.760908000 |
| H | 5.789466000  | -1.226655000 | 0.086888000  |
| H | 5.167552000  | 0.324961000  | 0.666553000  |
| H | 5.460809000  | 0.075469000  | -1.059768000 |
| H | 3.929764000  | -3.213800000 | -1.359100000 |
| H | 3.624796000  | -2.001222000 | -2.608060000 |
| H | 2.256672000  | -2.733074000 | -1.749450000 |
| H | -1.314571000 | 0.443823000  | 1.360323000  |
| H | 0.387176000  | -1.243834000 | 2.650478000  |
| H | -1.328822000 | -1.185417000 | 3.109999000  |
| H | 0.055266000  | -3.178792000 | 1.261037000  |
| H | -1.045667000 | -3.549215000 | 2.598162000  |
| H | -1.817135000 | -3.305965000 | -0.116514000 |
| H | -2.949961000 | -3.093805000 | 1.240136000  |
| H | -5.084218000 | -0.118383000 | -1.168413000 |
| H | -4.511624000 | 0.277695000  | 0.485770000  |

H -4.939329000 -1.414172000 0.054177000  
Zero-point correction= 0.387208 (Hartree/Particle)  
Sum of electronic and zero-point Energies= -1983.515487

**9a-cyclic2-CDCl<sub>3</sub>**

symmetry c1

|    |              |              |              |
|----|--------------|--------------|--------------|
| Si | -1.238124000 | 2.782900000  | -0.331161000 |
| Si | -2.440484000 | -2.331036000 | -0.003850000 |
| F  | -2.698138000 | 3.566485000  | -0.642828000 |
| F  | -3.371510000 | -3.344785000 | 0.892614000  |
| O  | 0.487434000  | 1.464266000  | 0.259758000  |
| O  | 1.257251000  | -0.971083000 | -1.706772000 |
| O  | 3.311884000  | 0.497652000  | -1.644429000 |
| S  | 2.565295000  | -0.648070000 | -1.148439000 |
| N  | -1.243745000 | 0.153326000  | 0.785211000  |
| N  | 2.363366000  | -0.520262000 | 0.479246000  |
| C  | -0.447554000 | 4.033588000  | 0.814560000  |
| C  | -0.557051000 | 2.641948000  | -2.066182000 |
| C  | -2.112763000 | 1.262603000  | 0.422683000  |
| C  | 0.067671000  | 0.371089000  | 0.671677000  |
| C  | -1.862909000 | -1.066470000 | 1.298370000  |
| C  | -1.046783000 | -3.333988000 | -0.709055000 |
| C  | -3.518340000 | -1.586991000 | -1.320360000 |
| C  | 1.060414000  | -0.702973000 | 1.100285000  |
| C  | 1.414381000  | -0.550696000 | 2.588264000  |
| C  | 2.500995000  | 0.524449000  | 2.580738000  |
| C  | 3.310289000  | 0.233545000  | 1.316837000  |
| C  | 3.606885000  | -2.076979000 | -1.343069000 |
| H  | -0.726199000 | 5.047274000  | 0.512705000  |
| H  | 0.640117000  | 3.947911000  | 0.812319000  |
| H  | -0.797294000 | 3.887275000  | 1.841945000  |
| H  | -0.778471000 | 3.553632000  | -2.629208000 |
| H  | -1.027943000 | 1.806317000  | -2.594231000 |
| H  | 0.520546000  | 2.472413000  | -2.066905000 |
| H  | -2.667527000 | 1.588844000  | 1.312262000  |

|                                            |              |              |                             |
|--------------------------------------------|--------------|--------------|-----------------------------|
| H                                          | -2.860433000 | 0.920300000  | -0.299647000                |
| H                                          | -2.740082000 | -0.762971000 | 1.880340000                 |
| H                                          | -1.200879000 | -1.561730000 | 2.013769000                 |
| H                                          | -1.435640000 | -4.069659000 | -1.419665000                |
| H                                          | -0.507932000 | -3.874607000 | 0.075111000                 |
| H                                          | -0.337782000 | -2.689965000 | -1.239468000                |
| H                                          | -3.900059000 | -2.375950000 | -1.975675000                |
| H                                          | -2.946715000 | -0.890271000 | -1.941400000                |
| H                                          | -4.372590000 | -1.052488000 | -0.896561000                |
| H                                          | 0.669280000  | -1.694512000 | 0.872485000                 |
| H                                          | 0.550124000  | -0.281798000 | 3.198974000                 |
| H                                          | 1.809756000  | -1.502809000 | 2.952529000                 |
| H                                          | 2.046699000  | 1.514340000  | 2.506496000                 |
| H                                          | 3.119693000  | 0.497603000  | 3.478903000                 |
| H                                          | 3.633688000  | 1.144532000  | 0.811317000                 |
| H                                          | 4.189504000  | -0.384256000 | 1.529518000                 |
| H                                          | 3.793739000  | -2.196905000 | -2.410577000                |
| H                                          | 3.084089000  | -2.944530000 | -0.942580000                |
| H                                          | 4.543641000  | -1.903143000 | -0.813799000                |
| Zero-point correction=                     |              |              | 0.387487 (Hartree/Particle) |
| Sum of electronic and zero-point Energies= |              |              | -1983.537676                |

### 9a-acyclic2-CDCl<sub>3</sub>

symmetry c1

|    |              |              |              |
|----|--------------|--------------|--------------|
| Si | 0.969882000  | 3.097097000  | 0.195258000  |
| Si | 3.074916000  | -1.708626000 | -0.350355000 |
| F  | 1.621042000  | 4.109187000  | 1.315715000  |
| F  | 2.486288000  | -2.058515000 | 1.144570000  |
| O  | -0.060516000 | -1.496299000 | -0.802987000 |
| O  | -2.368241000 | 0.777768000  | -1.425662000 |
| O  | -3.677330000 | -1.374143000 | -1.630304000 |
| S  | -3.202975000 | -0.257132000 | -0.827139000 |
| N  | 1.082391000  | 0.266713000  | -0.008719000 |
| N  | -2.401602000 | -0.827059000 | 0.481854000  |
| C  | 1.865713000  | 3.385806000  | -1.407792000 |

|   |              |              |              |
|---|--------------|--------------|--------------|
| C | -0.840556000 | 3.491775000  | 0.074966000  |
| C | 1.300550000  | 1.371812000  | 0.922797000  |
| C | -0.004538000 | -0.533096000 | -0.045783000 |
| C | 2.192233000  | -0.103715000 | -0.883444000 |
| C | 4.902032000  | -1.403537000 | -0.138793000 |
| C | 2.733565000  | -3.148379000 | -1.470922000 |
| C | -1.145871000 | -0.246579000 | 0.935389000  |
| C | -0.919568000 | -1.014070000 | 2.248219000  |
| C | -1.455792000 | -2.409908000 | 1.930886000  |
| C | -2.677962000 | -2.154373000 | 1.049717000  |
| C | -4.642524000 | 0.544939000  | -0.153340000 |
| H | 1.674139000  | 4.402294000  | -1.764468000 |
| H | 1.513267000  | 2.691112000  | -2.176260000 |
| H | 2.946687000  | 3.261318000  | -1.300210000 |
| H | -0.982417000 | 4.491189000  | -0.347370000 |
| H | -1.317499000 | 3.470497000  | 1.059817000  |
| H | -1.351422000 | 2.771328000  | -0.572370000 |
| H | 2.340170000  | 1.325933000  | 1.266715000  |
| H | 0.702849000  | 1.234734000  | 1.826744000  |
| H | 2.903156000  | 0.724999000  | -0.891743000 |
| H | 1.822235000  | -0.227855000 | -1.906211000 |
| H | 5.418841000  | -2.308581000 | 0.193677000  |
| H | 5.092508000  | -0.612045000 | 0.592071000  |
| H | 5.348592000  | -1.095801000 | -1.090383000 |
| H | 3.212421000  | -4.059769000 | -1.101345000 |
| H | 3.125953000  | -2.945461000 | -2.473021000 |
| H | 1.656914000  | -3.309854000 | -1.551615000 |
| H | -1.267471000 | 0.824105000  | 1.101006000  |
| H | 0.130421000  | -1.025118000 | 2.546748000  |
| H | -1.504331000 | -0.541575000 | 3.042854000  |
| H | -0.708791000 | -2.971070000 | 1.366931000  |
| H | -1.708962000 | -2.975745000 | 2.828931000  |
| H | -2.785550000 | -2.899420000 | 0.260246000  |
| H | -3.603324000 | -2.125629000 | 1.636638000  |
| H | -5.223772000 | 0.928293000  | -0.992491000 |

|                                            |              |              |                    |
|--------------------------------------------|--------------|--------------|--------------------|
| H                                          | -4.315980000 | 1.359582000  | 0.491869000        |
| H                                          | -5.224701000 | -0.188249000 | 0.404544000        |
| Zero-point correction=                     |              | 0.386787     | (Hartree/Particle) |
| Sum of electronic and zero-point Energies= |              | -1983.530703 |                    |

### 9a-ts

symmetry c1

|    |              |              |              |
|----|--------------|--------------|--------------|
| Si | -3.048440000 | -1.382894000 | -0.219959000 |
| Si | -0.238432000 | 2.965528000  | -0.115602000 |
| F  | -4.193360000 | -2.241870000 | 0.577581000  |
| F  | -1.274608000 | 3.980023000  | 0.639922000  |
| O  | 0.471468000  | 0.443413000  | 2.680260000  |
| O  | 0.840978000  | -0.759121000 | -2.058339000 |
| O  | 3.200290000  | 0.128613000  | -1.832207000 |
| S  | 2.139524000  | -0.759417000 | -1.404961000 |
| N  | -1.205915000 | 0.564154000  | 1.118809000  |
| N  | 1.857137000  | -0.418054000 | 0.197227000  |
| C  | -3.945128000 | -0.343117000 | -1.479099000 |
| C  | -1.939556000 | -2.630622000 | -1.050687000 |
| C  | -2.319879000 | -0.386911000 | 1.236654000  |
| C  | 0.002678000  | 0.037467000  | 1.650806000  |
| C  | -1.111350000 | 1.285372000  | -0.149348000 |
| C  | -0.079503000 | 3.544948000  | -1.879683000 |
| C  | 1.378562000  | 3.060246000  | 0.794682000  |
| C  | 0.739703000  | -1.084352000 | 0.890010000  |
| C  | 1.394181000  | -2.100397000 | 1.846095000  |
| C  | 2.878026000  | -1.691217000 | 1.944464000  |
| C  | 2.997463000  | -0.400472000 | 1.124674000  |
| C  | 2.768094000  | -2.430950000 | -1.504409000 |
| H  | -4.601060000 | -0.979185000 | -2.081835000 |
| H  | -3.247344000 | 0.154008000  | -2.158769000 |
| H  | -4.565893000 | 0.421655000  | -1.003775000 |
| H  | -2.539334000 | -3.235517000 | -1.738623000 |
| H  | -1.483660000 | -3.313995000 | -0.327438000 |
| H  | -1.149469000 | -2.147566000 | -1.634598000 |

|                                            |              |              |                             |
|--------------------------------------------|--------------|--------------|-----------------------------|
| H                                          | -3.185003000 | 0.161787000  | 1.639457000                 |
| H                                          | -2.085744000 | -1.114633000 | 2.025552000                 |
| H                                          | -2.136026000 | 1.570518000  | -0.420245000                |
| H                                          | -0.730662000 | 0.671517000  | -0.983098000                |
| H                                          | 0.304428000  | 4.568544000  | -1.916703000                |
| H                                          | -1.043114000 | 3.529929000  | -2.397427000                |
| H                                          | 0.613381000  | 2.904544000  | -2.434645000                |
| H                                          | 1.746065000  | 4.090801000  | 0.775842000                 |
| H                                          | 2.125743000  | 2.423311000  | 0.312278000                 |
| H                                          | 1.269515000  | 2.751597000  | 1.836736000                 |
| H                                          | 0.074458000  | -1.536100000 | 0.155377000                 |
| H                                          | 0.906879000  | -2.077045000 | 2.821109000                 |
| H                                          | 1.289839000  | -3.112777000 | 1.447396000                 |
| H                                          | 3.186814000  | -1.526127000 | 2.977540000                 |
| H                                          | 3.520773000  | -2.474831000 | 1.534058000                 |
| H                                          | 2.885390000  | 0.475182000  | 1.766980000                 |
| H                                          | 3.930649000  | -0.290669000 | 0.570219000                 |
| H                                          | 2.937149000  | -2.637971000 | -2.561637000                |
| H                                          | 2.023713000  | -3.118266000 | -1.102424000                |
| H                                          | 3.707880000  | -2.494195000 | -0.956559000                |
| Zero-point correction=                     |              |              | 0.385834 (Hartree/Particle) |
| Sum of electronic and zero-point Energies= |              |              | -1983.472504                |

### 9a-ts-CDCl<sub>3</sub>

symmetry c1

|    |              |              |              |
|----|--------------|--------------|--------------|
| Si | 3.033023000  | -1.479829000 | 0.502141000  |
| Si | 0.623820000  | 3.005272000  | -0.178828000 |
| F  | 3.929537000  | -0.311721000 | 1.235366000  |
| F  | 1.867097000  | 3.707534000  | -1.000998000 |
| O  | -0.656465000 | 0.184941000  | -2.341153000 |
| O  | -1.859990000 | 0.973540000  | 1.212923000  |
| O  | -4.194146000 | 0.230573000  | 0.592058000  |
| S  | -2.818482000 | -0.087793000 | 0.933767000  |
| N  | 1.199987000  | 0.332564000  | -1.000676000 |
| N  | -2.201073000 | -0.964061000 | -0.304444000 |

|   |              |              |              |
|---|--------------|--------------|--------------|
| C | 1.889467000  | -2.136234000 | 1.820663000  |
| C | 4.224349000  | -2.782667000 | -0.089806000 |
| C | 2.279384000  | -0.664922000 | -1.042670000 |
| C | -0.095583000 | -0.165772000 | -1.338761000 |
| C | 1.212899000  | 1.238312000  | 0.153186000  |
| C | 0.482643000  | 3.891946000  | 1.452738000  |
| C | -0.884288000 | 3.221484000  | -1.237757000 |
| C | -0.757372000 | -1.197500000 | -0.409544000 |
| C | -0.698123000 | -2.609968000 | -1.024035000 |
| C | -1.976743000 | -2.689444000 | -1.853896000 |
| C | -3.006275000 | -1.997828000 | -0.972151000 |
| C | -2.851984000 | -1.158698000 | 2.358682000  |
| H | 2.490613000  | -2.586259000 | 2.617301000  |
| H | 1.227531000  | -2.914609000 | 1.429853000  |
| H | 1.280299000  | -1.348055000 | 2.271628000  |
| H | 4.827252000  | -3.158884000 | 0.741868000  |
| H | 4.904386000  | -2.385204000 | -0.848701000 |
| H | 3.688899000  | -3.631694000 | -0.526089000 |
| H | 3.148833000  | -0.185805000 | -1.519965000 |
| H | 2.005765000  | -1.459049000 | -1.747371000 |
| H | 2.259841000  | 1.363742000  | 0.452802000  |
| H | 0.691844000  | 0.831733000  | 1.034990000  |
| H | 0.289851000  | 4.957845000  | 1.300268000  |
| H | 1.395012000  | 3.791788000  | 2.047921000  |
| H | -0.350015000 | 3.476136000  | 2.028310000  |
| H | -1.059811000 | 4.288232000  | -1.408297000 |
| H | -1.758479000 | 2.802148000  | -0.733056000 |
| H | -0.772153000 | 2.722268000  | -2.202207000 |
| H | -0.278350000 | -1.167471000 | 0.570957000  |
| H | 0.203585000  | -2.786924000 | -1.611854000 |
| H | -0.722412000 | -3.346548000 | -0.214785000 |
| H | -1.855648000 | -2.134188000 | -2.786154000 |
| H | -2.262157000 | -3.715454000 | -2.091406000 |
| H | -3.819924000 | -1.538900000 | -1.533158000 |
| H | -3.432225000 | -2.701449000 | -0.244685000 |

|                                            |              |              |                             |
|--------------------------------------------|--------------|--------------|-----------------------------|
| H                                          | -3.248253000 | -0.576406000 | 3.190781000                 |
| H                                          | -1.836993000 | -1.489068000 | 2.580084000                 |
| H                                          | -3.504918000 | -2.005956000 | 2.150318000                 |
| Zero-point correction=                     |              |              | 0.384932 (Hartree/Particle) |
| Sum of electronic and zero-point Energies= |              |              | -1983.490984                |
